# Supplementary material for: Evaluating data quality collected by volunteers for first-level inspection of hydraulic structures in mountain catchments
Source: Copernicus journal article supplement (doi:10.5194/nhess-14-2681-2014), 2014-10-06
Supplement: Supplementary file 1 [file nhess-14-2681-2014-supplement.zip]

## FIRST LEVEL INSPECTION FORM – BRIDGE

What's your name and what time did you start the inspection?

|                                                                                  |                      |  |                           |                                                                                                                                                                             |
|----------------------------------------------------------------------------------|----------------------|--|---------------------------|-----------------------------------------------------------------------------------------------------------------------------------------------------------------------------|
|  | 1) INSPECTION DATE:  |  | 2) INSPECTION TIME:       |                                                                                                                                                                             |
|                                                                                  | 3) INSPECTOR's NAME: |  | 4) RAINFALL LAST 24hours: | <input type="radio"/> None <input type="radio"/> Intermittent rain<br><input type="radio"/> Steady rain <input type="radio"/> Heavy rain <input type="radio"/> I don't know |

Are you inspecting the right structure? (Use data provided by your coordinator)

|                                                                                                                                                                                                                                                                                                                     |                   |                                                                                                                                                                                                                      |                                                                                                                                                                                                                                                                                                           |  |
|---------------------------------------------------------------------------------------------------------------------------------------------------------------------------------------------------------------------------------------------------------------------------------------------------------------------|-------------------|----------------------------------------------------------------------------------------------------------------------------------------------------------------------------------------------------------------------|-----------------------------------------------------------------------------------------------------------------------------------------------------------------------------------------------------------------------------------------------------------------------------------------------------------|--|
|                                                                                                                                                                                                                                     | 1) STRUCTURE's ID |                                                                                                                                                                                                                      | 2) DENOMINATION or LOCATION:<br>Use two reference points,<br>e.g. Crossing Street X with stream Y.                                                                                                                                                                                                        |  |
| 3) TYPE                                                                                                                                                                                                                                                                                                             |                   | 4) NUMBER OF OPENING OR SPANS                                                                                                                                                                                        | 5) USE                                                                                                                                                                                                                                                                                                    |  |
| <input type="radio"/> Culvert <br><input type="radio"/> Bridge <br><input type="radio"/> Could not be answered <input type="radio"/> I don't know |                   | <input type="radio"/> 1 span<br><input type="radio"/> 2 spans<br><input type="radio"/> 3 spans<br><input type="radio"/> More spans<br><input type="radio"/> Could not be answered <input type="radio"/> I don't know | <input type="radio"/> Highway (SS-SP)<br><input type="radio"/> Municipal paved road<br><input type="radio"/> Municipal non-paved road<br><input type="radio"/> Pedestrian walkway<br><input type="radio"/> Other: _____<br><input type="radio"/> Could not be answered <input type="radio"/> I don't know |  |

How safe were the conditions to carry out the inspection?

|                                                                                  |                                                                                                                                                                                                           |                       |                                                                                                                                                                                                                                                           |                                            |                                                                                                                                                                                                                                     |
|----------------------------------------------------------------------------------|-----------------------------------------------------------------------------------------------------------------------------------------------------------------------------------------------------------|-----------------------|-----------------------------------------------------------------------------------------------------------------------------------------------------------------------------------------------------------------------------------------------------------|--------------------------------------------|-------------------------------------------------------------------------------------------------------------------------------------------------------------------------------------------------------------------------------------|
|  | 1) HOW EASY WAS TO REACH THE STRUCTURE?  #: _____                                                                        |                       |                                                                                                                                                                                                                                                           |                                            | <input type="radio"/> Could not be answered <input type="radio"/> I don't know                                                                                                                                                      |
| <input type="radio"/>                                                            | 1. It's next to the road. Assessable from the road.                                                                                                                                                       | <input type="radio"/> | 2. Accessible by car on a forest road or by foot.                                                                                                                                                                                                         | <input type="radio"/>                      | 3. Accessible only by foot.                                                                                                                                                                                                         |
| <input type="radio"/>                                                            | 4. The access to the structure requires the removal of trees or overcoming obstacles.                                                                                                                     |                       |                                                                                                                                                                                                                                                           | <input type="radio"/>                      | 5. It's too dangerous to reach the site.                                                                                                                                                                                            |
|  | 2) HOW IS THE STREAM DURING THE INSPECTION?  #: _____                                                                   |                       |                                                                                                                                                                                                                                                           |                                            |                                                                                                                                                                                                                                     |
| Stream water:                                                                    | <input type="radio"/> No (dry)<br><input type="radio"/> Yes, it's ponding<br><input type="radio"/> Yes, it's flowing<br><input type="radio"/> Could not be answered<br><input type="radio"/> I don't know | Stream water flows:   | <input type="radio"/> Clear and transparent<br><input type="radio"/> Transporting mainly fine material<br><input type="radio"/> Transporting wood and other material<br><input type="radio"/> Could not be answered<br><input type="radio"/> I don't know | Rainfall conditions during the inspection: | <input type="radio"/> None<br><input type="radio"/> Intermittent rain<br><input type="radio"/> Steady rain<br><input type="radio"/> Heavy rain<br><input type="radio"/> Could not be answered<br><input type="radio"/> I don't know |
|                                                                                  |                                                                                                                                                                                                           |                       |                                                                                                                                                                                                                                                           | Snow presence:                             | <input type="radio"/> No<br><input type="radio"/> Yes<br><input type="radio"/> Could not be answered<br><input type="radio"/> I don't know                                                                                          |

Could you rate the following aspects regarding the functionality of the structure?

|                                                                                                                                                                                           |                                                                                                                                                                                                                                                                                                    |                                                                                                                                                                                                                                                                                          |
|-------------------------------------------------------------------------------------------------------------------------------------------------------------------------------------------|----------------------------------------------------------------------------------------------------------------------------------------------------------------------------------------------------------------------------------------------------------------------------------------------------|------------------------------------------------------------------------------------------------------------------------------------------------------------------------------------------------------------------------------------------------------------------------------------------|
|                                                                                                          | A) CONDITION OF THE STRUCTURE                                                                                                                                                                                                                                                                      |                                                                                                                                                                                                                                                                                          |
| 1) IS THERE EROSION AT THE BASIS OF THE PILLAR OR ALONG THE ABUTMENTS?  #: _____                     |                                                                                                                                                                                                                                                                                                    |                                                                                                                                                                                                                                                                                          |
| <br><input type="radio"/> No<br><input type="radio"/> Does not apply (culvert)                          | <br><input type="radio"/> Yes, erosion at the basis of the Pillar or along the abutment<br><input type="checkbox"/> RIGHT abutment<br><input type="checkbox"/> LEFT abutment<br><input type="checkbox"/> Pillar | <br><input type="radio"/> Yes, there is water that flow under the eroded zone<br><input type="checkbox"/> RIGHT abutment<br><input type="checkbox"/> LEFT abutment<br><input type="checkbox"/> Pillar |
| <br><input type="radio"/> Could not be answered<br><input type="radio"/> I don't know                 |                                                                                                                                                                                                                                                                                                    | <br>UPSTREAM<br>Crossing structure<br>Right Abutment<br>Left Abutment<br>DOWNSTREAM                                                                                                                 |
| 2) IS THERE ANY NATURAL JUMP EXCAVATED BY THE STREAM OF AT LEAST 1 METER DEPTH?  #: _____              |                                                                                                                                                                                                                                                                                                    | 3) IS THERE ANY OTHER DAMAGE AT THE BASIS OF THE STRUCTURE? (e.g. missing parts):  #: _____                                                                                                         |
| <input type="radio"/> No<br><input type="radio"/> Yes <input type="checkbox"/> Upstream <input type="checkbox"/> Downstream <input type="checkbox"/> In correspondence with the structure | <input type="radio"/> Could not be answered<br><input type="radio"/> I don't know                                                                                                                                                                                                                  | <input type="radio"/> No<br><input type="radio"/> Yes<br><input type="radio"/> Could not be answered<br><input type="radio"/> I don't know                                                                                                                                               |
| How much has excavated? (m): _____<br><input type="radio"/> Measured <input type="radio"/> Estimated <input type="radio"/> To measure                                                     |                                                                                                                                                                                                                                                                                                    | Comments: _____<br>_____<br>_____                                                                                                                                                                                                                                                        |

|                                                                                                                                                                                                                          |                                         |                               |                                                                                                                                          |                                                            |                                                      |                                                                                   |
|--------------------------------------------------------------------------------------------------------------------------------------------------------------------------------------------------------------------------|-----------------------------------------|-------------------------------|------------------------------------------------------------------------------------------------------------------------------------------|------------------------------------------------------------|------------------------------------------------------|-----------------------------------------------------------------------------------|
| <b>B) LEVEL OF OBSTRUCTION AT THE STREAM CHANNEL AND STRUCTURE'S LOCATION:</b>                                                                                                                                           |                                         |                               |                                                                                                                                          |                                                            |                                                      |                                                                                   |
| <b>Obstruction of wood, sediments or other waste</b>                                                                                                                                                                     |                                         |                               |                                                                                                                                          |                                                            |                                                      |                                                                                   |
| <b>1) UPSTREAM</b><br>#: _____                                                                                                                                                                                           | <input type="radio"/> 1. No obstruction | <input type="radio"/> 2. <20% | <input type="radio"/> 3. 20-40%                                                                                                          | <input type="radio"/> 4. 40-60% with deviation of the flow | <input type="radio"/> 5. > 60% or buried by sediment | <input type="radio"/> Could not be answered<br><input type="radio"/> I don't know |
| <b>2) DOWNSTREAM</b><br>#: _____                                                                                                                                                                                         | <input type="radio"/> 1. No obstruction | <input type="radio"/> 2. <20% | <input type="radio"/> 3. 20-40%                                                                                                          | <input type="radio"/> 4. 40-60% with deviation of the flow | <input type="radio"/> 5. > 60% or buried by sediment | <input type="radio"/> Could not be answered<br><input type="radio"/> I don't know |
| <b>3) Is there any island with vegetation (shrub) or other man-made structures that reduce the opening section for the flow?</b> #: _____                                                                                |                                         |                               | <b>4) What is the height of the structure from the lowest point of the stream?</b> #: _____                                              |                                                            |                                                      |                                                                                   |
| <input type="radio"/> No<br><input type="radio"/> Could not be answered<br><input type="radio"/> I don't know<br><input type="radio"/> Yes, <b>Comments:</b><br>(e.g. pipes or elements attached to the structure) _____ |                                         |                               | If yes, where?<br><input type="checkbox"/> Upstream<br><input type="checkbox"/> Downstream<br><input type="checkbox"/> In correspondence |                                                            |                                                      |                                                                                   |
|                                                                                                                                                                                                                          |                                         |                               | Maximum height: _____ (m)<br><input type="radio"/> Measured<br><input type="radio"/> Estimated<br><input type="radio"/> To measure       |                                                            |                                                      |                                                                                   |

|                                                                                                                                                                                                              |                                                                                                   |                                                                                                     |                                                                                                    |                                                                                                                  |  |
|--------------------------------------------------------------------------------------------------------------------------------------------------------------------------------------------------------------|---------------------------------------------------------------------------------------------------|-----------------------------------------------------------------------------------------------------|----------------------------------------------------------------------------------------------------|------------------------------------------------------------------------------------------------------------------|--|
| <b>C) LEVEL OF EROSION OF THE BANK WITHIN 20 meters UPSTREAM AND DOWNSTREAM OF THE STRUCTURE?</b><br>Use the scale to assess the erosion level with reference to the worst case in each section of the bank. |                                                                                                   |                                                                                                     |                                                                                                    |                                                                                                                  |  |
| <b>1. Minimum erosion</b><br>Structural elements are in good status "in order" or continuous presence of vegetation in the bank.                                                                             | <b>2.</b><br>Elements with slight erosion or slight irregularities in the vegetation of the bank. | <b>3.</b><br>Elements with visible erosion or visible irregularities in the vegetation of the bank. | <b>4.</b><br>Parts are eroded by the stream flow with an opening below the protection of the bank. | <b>5. Maximum erosion</b><br>Parts are missing, there us an important drift. Bank without vegetative protection. |  |

|                                                                                                                                                                                                                                                                                                                                                                                                                                                                                                                                                                                                                                                                                                                                                                                                                                     |                                                                                                                                                                                                                                                                                                                                                                      |                                                                                                                                                                                                                                                                                                                                                                      |                          |                          |                          |                          |                          |                                                                                                                                                                                                                                                                                                                                                                                                                                                                                                                                                                                                                                                                                                                                                                                                                                     |                                                                                                                                                                                                                                              |                                                                                                                                                                                                                                                                                                                                                                      |                          |                          |                          |                          |                          |                                                                                        |
|-------------------------------------------------------------------------------------------------------------------------------------------------------------------------------------------------------------------------------------------------------------------------------------------------------------------------------------------------------------------------------------------------------------------------------------------------------------------------------------------------------------------------------------------------------------------------------------------------------------------------------------------------------------------------------------------------------------------------------------------------------------------------------------------------------------------------------------|----------------------------------------------------------------------------------------------------------------------------------------------------------------------------------------------------------------------------------------------------------------------------------------------------------------------------------------------------------------------|----------------------------------------------------------------------------------------------------------------------------------------------------------------------------------------------------------------------------------------------------------------------------------------------------------------------------------------------------------------------|--------------------------|--------------------------|--------------------------|--------------------------|--------------------------|-------------------------------------------------------------------------------------------------------------------------------------------------------------------------------------------------------------------------------------------------------------------------------------------------------------------------------------------------------------------------------------------------------------------------------------------------------------------------------------------------------------------------------------------------------------------------------------------------------------------------------------------------------------------------------------------------------------------------------------------------------------------------------------------------------------------------------------|----------------------------------------------------------------------------------------------------------------------------------------------------------------------------------------------------------------------------------------------|----------------------------------------------------------------------------------------------------------------------------------------------------------------------------------------------------------------------------------------------------------------------------------------------------------------------------------------------------------------------|--------------------------|--------------------------|--------------------------|--------------------------|--------------------------|----------------------------------------------------------------------------------------|
| <b>1) LEFT BANK 20m UPSTREAM</b><br>#: _____                                                                                                                                                                                                                                                                                                                                                                                                                                                                                                                                                                                                                                                                                                                                                                                        | <b>2) RIGHT BANK 20 m UPSTREAM</b><br>#: _____                                                                                                                                                                                                                                                                                                                       | Mark on the scheme where the erosion level is equal or larger than 3.                                                                                                                                                                                                                                                                                                |                          |                          |                          |                          |                          |                                                                                                                                                                                                                                                                                                                                                                                                                                                                                                                                                                                                                                                                                                                                                                                                                                     |                                                                                                                                                                                                                                              |                                                                                                                                                                                                                                                                                                                                                                      |                          |                          |                          |                          |                          |                                                                                        |
| <table border="1" style="width: 100%; border-collapse: collapse;"> <tr> <td style="width: 50%; padding: 5px;"> <b>Presence of walls or protection works</b><br/> <input type="radio"/> No<br/> <input type="radio"/> ≤ Less 20m.<br/> <input type="radio"/> &gt; More than 20m.<br/> <input type="radio"/> Could not be answered<br/> <input type="radio"/> I don't know         </td> <td style="width: 50%; padding: 5px;"> <b>Erosion level in the bank</b><br/> <table style="width: 100%; text-align: center;"> <tr> <td><input type="radio"/> 1.</td> <td><input type="radio"/> 2.</td> <td><input type="radio"/> 3.</td> <td><input type="radio"/> 4.</td> <td><input type="radio"/> 5.</td> </tr> </table> <input type="radio"/> Could not be answered<br/> <input type="radio"/> I don't know         </td> </tr> </table> | <b>Presence of walls or protection works</b><br><input type="radio"/> No<br><input type="radio"/> ≤ Less 20m.<br><input type="radio"/> > More than 20m.<br><input type="radio"/> Could not be answered<br><input type="radio"/> I don't know                                                                                                                         | <b>Erosion level in the bank</b><br><table style="width: 100%; text-align: center;"> <tr> <td><input type="radio"/> 1.</td> <td><input type="radio"/> 2.</td> <td><input type="radio"/> 3.</td> <td><input type="radio"/> 4.</td> <td><input type="radio"/> 5.</td> </tr> </table> <input type="radio"/> Could not be answered<br><input type="radio"/> I don't know | <input type="radio"/> 1. | <input type="radio"/> 2. | <input type="radio"/> 3. | <input type="radio"/> 4. | <input type="radio"/> 5. | <table border="1" style="width: 100%; border-collapse: collapse;"> <tr> <td style="width: 50%; padding: 5px;"> <b>Presence of walls or protection works</b><br/> <input type="radio"/> No<br/> <input type="radio"/> ≤ Less 20m.<br/> <input type="radio"/> &gt; More than 20m.<br/> <input type="radio"/> Could not be answered<br/> <input type="radio"/> I don't know         </td> <td style="width: 50%; padding: 5px;"> <b>Erosion level in the bank</b><br/> <table style="width: 100%; text-align: center;"> <tr> <td><input type="radio"/> 1.</td> <td><input type="radio"/> 2.</td> <td><input type="radio"/> 3.</td> <td><input type="radio"/> 4.</td> <td><input type="radio"/> 5.</td> </tr> </table> <input type="radio"/> Could not be answered<br/> <input type="radio"/> I don't know         </td> </tr> </table> | <b>Presence of walls or protection works</b><br><input type="radio"/> No<br><input type="radio"/> ≤ Less 20m.<br><input type="radio"/> > More than 20m.<br><input type="radio"/> Could not be answered<br><input type="radio"/> I don't know | <b>Erosion level in the bank</b><br><table style="width: 100%; text-align: center;"> <tr> <td><input type="radio"/> 1.</td> <td><input type="radio"/> 2.</td> <td><input type="radio"/> 3.</td> <td><input type="radio"/> 4.</td> <td><input type="radio"/> 5.</td> </tr> </table> <input type="radio"/> Could not be answered<br><input type="radio"/> I don't know | <input type="radio"/> 1. | <input type="radio"/> 2. | <input type="radio"/> 3. | <input type="radio"/> 4. | <input type="radio"/> 5. | <div style="text-align: center;">             Meters    UPSTREAM    Meters<br/> </div> |
| <b>Presence of walls or protection works</b><br><input type="radio"/> No<br><input type="radio"/> ≤ Less 20m.<br><input type="radio"/> > More than 20m.<br><input type="radio"/> Could not be answered<br><input type="radio"/> I don't know                                                                                                                                                                                                                                                                                                                                                                                                                                                                                                                                                                                        | <b>Erosion level in the bank</b><br><table style="width: 100%; text-align: center;"> <tr> <td><input type="radio"/> 1.</td> <td><input type="radio"/> 2.</td> <td><input type="radio"/> 3.</td> <td><input type="radio"/> 4.</td> <td><input type="radio"/> 5.</td> </tr> </table> <input type="radio"/> Could not be answered<br><input type="radio"/> I don't know | <input type="radio"/> 1.                                                                                                                                                                                                                                                                                                                                             | <input type="radio"/> 2. | <input type="radio"/> 3. | <input type="radio"/> 4. | <input type="radio"/> 5. |                          |                                                                                                                                                                                                                                                                                                                                                                                                                                                                                                                                                                                                                                                                                                                                                                                                                                     |                                                                                                                                                                                                                                              |                                                                                                                                                                                                                                                                                                                                                                      |                          |                          |                          |                          |                          |                                                                                        |
| <input type="radio"/> 1.                                                                                                                                                                                                                                                                                                                                                                                                                                                                                                                                                                                                                                                                                                                                                                                                            | <input type="radio"/> 2.                                                                                                                                                                                                                                                                                                                                             | <input type="radio"/> 3.                                                                                                                                                                                                                                                                                                                                             | <input type="radio"/> 4. | <input type="radio"/> 5. |                          |                          |                          |                                                                                                                                                                                                                                                                                                                                                                                                                                                                                                                                                                                                                                                                                                                                                                                                                                     |                                                                                                                                                                                                                                              |                                                                                                                                                                                                                                                                                                                                                                      |                          |                          |                          |                          |                          |                                                                                        |
| <b>Presence of walls or protection works</b><br><input type="radio"/> No<br><input type="radio"/> ≤ Less 20m.<br><input type="radio"/> > More than 20m.<br><input type="radio"/> Could not be answered<br><input type="radio"/> I don't know                                                                                                                                                                                                                                                                                                                                                                                                                                                                                                                                                                                        | <b>Erosion level in the bank</b><br><table style="width: 100%; text-align: center;"> <tr> <td><input type="radio"/> 1.</td> <td><input type="radio"/> 2.</td> <td><input type="radio"/> 3.</td> <td><input type="radio"/> 4.</td> <td><input type="radio"/> 5.</td> </tr> </table> <input type="radio"/> Could not be answered<br><input type="radio"/> I don't know | <input type="radio"/> 1.                                                                                                                                                                                                                                                                                                                                             | <input type="radio"/> 2. | <input type="radio"/> 3. | <input type="radio"/> 4. | <input type="radio"/> 5. |                          |                                                                                                                                                                                                                                                                                                                                                                                                                                                                                                                                                                                                                                                                                                                                                                                                                                     |                                                                                                                                                                                                                                              |                                                                                                                                                                                                                                                                                                                                                                      |                          |                          |                          |                          |                          |                                                                                        |
| <input type="radio"/> 1.                                                                                                                                                                                                                                                                                                                                                                                                                                                                                                                                                                                                                                                                                                                                                                                                            | <input type="radio"/> 2.                                                                                                                                                                                                                                                                                                                                             | <input type="radio"/> 3.                                                                                                                                                                                                                                                                                                                                             | <input type="radio"/> 4. | <input type="radio"/> 5. |                          |                          |                          |                                                                                                                                                                                                                                                                                                                                                                                                                                                                                                                                                                                                                                                                                                                                                                                                                                     |                                                                                                                                                                                                                                              |                                                                                                                                                                                                                                                                                                                                                                      |                          |                          |                          |                          |                          |                                                                                        |
| <b>3) LEFT BANK 20m DOWNSTREAM</b><br>#: _____                                                                                                                                                                                                                                                                                                                                                                                                                                                                                                                                                                                                                                                                                                                                                                                      | <b>4) RIGHT BANK 20m DOWNSTREAM</b><br>#: _____                                                                                                                                                                                                                                                                                                                      | <div style="text-align: center;">             Meters    DOWNSTREAM    Meters<br/> </div>                                                                                                                                                                                                                                                                             |                          |                          |                          |                          |                          |                                                                                                                                                                                                                                                                                                                                                                                                                                                                                                                                                                                                                                                                                                                                                                                                                                     |                                                                                                                                                                                                                                              |                                                                                                                                                                                                                                                                                                                                                                      |                          |                          |                          |                          |                          |                                                                                        |
| <table border="1" style="width: 100%; border-collapse: collapse;"> <tr> <td style="width: 50%; padding: 5px;"> <b>Presence of walls or protection works</b><br/> <input type="radio"/> No<br/> <input type="radio"/> ≤ Less 20m.<br/> <input type="radio"/> &gt; More than 20m.<br/> <input type="radio"/> Could not be answered<br/> <input type="radio"/> I don't know         </td> <td style="width: 50%; padding: 5px;"> <b>Erosion level in the bank</b><br/> <table style="width: 100%; text-align: center;"> <tr> <td><input type="radio"/> 1.</td> <td><input type="radio"/> 2.</td> <td><input type="radio"/> 3.</td> <td><input type="radio"/> 4.</td> <td><input type="radio"/> 5.</td> </tr> </table> <input type="radio"/> Could not be answered<br/> <input type="radio"/> I don't know         </td> </tr> </table> | <b>Presence of walls or protection works</b><br><input type="radio"/> No<br><input type="radio"/> ≤ Less 20m.<br><input type="radio"/> > More than 20m.<br><input type="radio"/> Could not be answered<br><input type="radio"/> I don't know                                                                                                                         | <b>Erosion level in the bank</b><br><table style="width: 100%; text-align: center;"> <tr> <td><input type="radio"/> 1.</td> <td><input type="radio"/> 2.</td> <td><input type="radio"/> 3.</td> <td><input type="radio"/> 4.</td> <td><input type="radio"/> 5.</td> </tr> </table> <input type="radio"/> Could not be answered<br><input type="radio"/> I don't know | <input type="radio"/> 1. | <input type="radio"/> 2. | <input type="radio"/> 3. | <input type="radio"/> 4. | <input type="radio"/> 5. | <table border="1" style="width: 100%; border-collapse: collapse;"> <tr> <td style="width: 50%; padding: 5px;"> <b>Presence of walls or protection works</b><br/> <input type="radio"/> No<br/> <input type="radio"/> ≤ Less 20m.<br/> <input type="radio"/> &gt; More than 20m.<br/> <input type="radio"/> Could not be answered<br/> <input type="radio"/> I don't know         </td> <td style="width: 50%; padding: 5px;"> <b>Erosion level in the bank</b><br/> <table style="width: 100%; text-align: center;"> <tr> <td><input type="radio"/> 1.</td> <td><input type="radio"/> 2.</td> <td><input type="radio"/> 3.</td> <td><input type="radio"/> 4.</td> <td><input type="radio"/> 5.</td> </tr> </table> <input type="radio"/> Could not be answered<br/> <input type="radio"/> I don't know         </td> </tr> </table> | <b>Presence of walls or protection works</b><br><input type="radio"/> No<br><input type="radio"/> ≤ Less 20m.<br><input type="radio"/> > More than 20m.<br><input type="radio"/> Could not be answered<br><input type="radio"/> I don't know | <b>Erosion level in the bank</b><br><table style="width: 100%; text-align: center;"> <tr> <td><input type="radio"/> 1.</td> <td><input type="radio"/> 2.</td> <td><input type="radio"/> 3.</td> <td><input type="radio"/> 4.</td> <td><input type="radio"/> 5.</td> </tr> </table> <input type="radio"/> Could not be answered<br><input type="radio"/> I don't know | <input type="radio"/> 1. | <input type="radio"/> 2. | <input type="radio"/> 3. | <input type="radio"/> 4. | <input type="radio"/> 5. |                                                                                        |
| <b>Presence of walls or protection works</b><br><input type="radio"/> No<br><input type="radio"/> ≤ Less 20m.<br><input type="radio"/> > More than 20m.<br><input type="radio"/> Could not be answered<br><input type="radio"/> I don't know                                                                                                                                                                                                                                                                                                                                                                                                                                                                                                                                                                                        | <b>Erosion level in the bank</b><br><table style="width: 100%; text-align: center;"> <tr> <td><input type="radio"/> 1.</td> <td><input type="radio"/> 2.</td> <td><input type="radio"/> 3.</td> <td><input type="radio"/> 4.</td> <td><input type="radio"/> 5.</td> </tr> </table> <input type="radio"/> Could not be answered<br><input type="radio"/> I don't know | <input type="radio"/> 1.                                                                                                                                                                                                                                                                                                                                             | <input type="radio"/> 2. | <input type="radio"/> 3. | <input type="radio"/> 4. | <input type="radio"/> 5. |                          |                                                                                                                                                                                                                                                                                                                                                                                                                                                                                                                                                                                                                                                                                                                                                                                                                                     |                                                                                                                                                                                                                                              |                                                                                                                                                                                                                                                                                                                                                                      |                          |                          |                          |                          |                          |                                                                                        |
| <input type="radio"/> 1.                                                                                                                                                                                                                                                                                                                                                                                                                                                                                                                                                                                                                                                                                                                                                                                                            | <input type="radio"/> 2.                                                                                                                                                                                                                                                                                                                                             | <input type="radio"/> 3.                                                                                                                                                                                                                                                                                                                                             | <input type="radio"/> 4. | <input type="radio"/> 5. |                          |                          |                          |                                                                                                                                                                                                                                                                                                                                                                                                                                                                                                                                                                                                                                                                                                                                                                                                                                     |                                                                                                                                                                                                                                              |                                                                                                                                                                                                                                                                                                                                                                      |                          |                          |                          |                          |                          |                                                                                        |
| <b>Presence of walls or protection works</b><br><input type="radio"/> No<br><input type="radio"/> ≤ Less 20m.<br><input type="radio"/> > More than 20m.<br><input type="radio"/> Could not be answered<br><input type="radio"/> I don't know                                                                                                                                                                                                                                                                                                                                                                                                                                                                                                                                                                                        | <b>Erosion level in the bank</b><br><table style="width: 100%; text-align: center;"> <tr> <td><input type="radio"/> 1.</td> <td><input type="radio"/> 2.</td> <td><input type="radio"/> 3.</td> <td><input type="radio"/> 4.</td> <td><input type="radio"/> 5.</td> </tr> </table> <input type="radio"/> Could not be answered<br><input type="radio"/> I don't know | <input type="radio"/> 1.                                                                                                                                                                                                                                                                                                                                             | <input type="radio"/> 2. | <input type="radio"/> 3. | <input type="radio"/> 4. | <input type="radio"/> 5. |                          |                                                                                                                                                                                                                                                                                                                                                                                                                                                                                                                                                                                                                                                                                                                                                                                                                                     |                                                                                                                                                                                                                                              |                                                                                                                                                                                                                                                                                                                                                                      |                          |                          |                          |                          |                          |                                                                                        |
| <input type="radio"/> 1.                                                                                                                                                                                                                                                                                                                                                                                                                                                                                                                                                                                                                                                                                                                                                                                                            | <input type="radio"/> 2.                                                                                                                                                                                                                                                                                                                                             | <input type="radio"/> 3.                                                                                                                                                                                                                                                                                                                                             | <input type="radio"/> 4. | <input type="radio"/> 5. |                          |                          |                          |                                                                                                                                                                                                                                                                                                                                                                                                                                                                                                                                                                                                                                                                                                                                                                                                                                     |                                                                                                                                                                                                                                              |                                                                                                                                                                                                                                                                                                                                                                      |                          |                          |                          |                          |                          |                                                                                        |

|                                                                         |                                                    |                                                    |                                                    |                                                    |                                         |
|-------------------------------------------------------------------------|----------------------------------------------------|----------------------------------------------------|----------------------------------------------------|----------------------------------------------------|-----------------------------------------|
| <b>Is there any anthropic element within the same control distance?</b> |                                                    |                                                    |                                                    |                                                    |                                         |
| Presence within 20m distance from the stream:                           | <b>1) 20m UPSTREAM</b>                             |                                                    | <b>2) 20m DOWNSTREAM</b>                           |                                                    | <b>Comments:</b> Infrastructure details |
|                                                                         | Left                                               | Right                                              | Left                                               | Right                                              |                                         |
| Road infrastructure                                                     | <input type="radio"/> No <input type="radio"/> Yes |                                         |
| Buildings                                                               | <input type="radio"/> No <input type="radio"/> Yes |                                         |

|                                                                                                                                |                                                                                   |
|--------------------------------------------------------------------------------------------------------------------------------|-----------------------------------------------------------------------------------|
| <b>Could an ordinary intervention with volunteers of CP improve the functionality of the structure?</b> <b>Comments:</b> _____ | <input type="radio"/> Could not be answered<br><input type="radio"/> I don't know |
|--------------------------------------------------------------------------------------------------------------------------------|-----------------------------------------------------------------------------------|

|                                             |                                                                                                   |                                                                 |                                                                                                   |
|---------------------------------------------|---------------------------------------------------------------------------------------------------|-----------------------------------------------------------------|---------------------------------------------------------------------------------------------------|
| <input type="radio"/> No action is required | <input type="radio"/> Requires routine cleaning of blockages by hand (maximum with 10 volunteers) | <input type="radio"/> Requires cleaning with equipment support. | <input type="radio"/> Other action than cleaning is required (Need for a second level inspection) |
|---------------------------------------------|---------------------------------------------------------------------------------------------------|-----------------------------------------------------------------|---------------------------------------------------------------------------------------------------|
