# Supplementary material for: Evaluating data quality collected by volunteers for first-level inspection of hydraulic structures in mountain catchments
Source: Copernicus journal article supplement (doi:10.5194/nhess-14-2681-2014), 2014-10-06
Supplement: Supplementary file 2 [file nhess-14-2681-2014-supplement.zip]

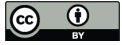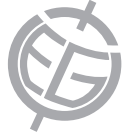

*Supplement of*

**Evaluating data quality collected by volunteers for first-level inspection of hydraulic structures in mountain catchments**

**V. J. Cortes Arevalo et al.**

*Correspondence to:* V. J. Cortes Arevalo ([juliette.cortes@irpi.cnr.it](mailto:juliette.cortes@irpi.cnr.it))

- Supplement-Cover-Letter.pdf
- Supp1\_Bridges.pdf
- Supp2\_Checkdams.pdf
