# Supplementary material for: Evaluating data quality collected by volunteers for first-level inspection of hydraulic structures in mountain catchments
Source: Copernicus journal article supplement (doi:10.5194/nhess-14-2681-2014), 2014-10-06
Supplement: Supplementary file 3 [file nhess-14-2681-2014-supplement.zip]

FIRST LEVEL INSPECTION FORM – CHECK DAM

What's your name and what time did you start the inspection?

|                                                                                  |                      |  |                           |                                                                                                                                                                             |
|----------------------------------------------------------------------------------|----------------------|--|---------------------------|-----------------------------------------------------------------------------------------------------------------------------------------------------------------------------|
|  | 1) INSPECTION DATE:  |  | 2) INSPECTION TIME:       |                                                                                                                                                                             |
|                                                                                  | 3) INSPECTOR'S NAME: |  | 4) RAINFALL LAST 24hours: | <input type="radio"/> None <input type="radio"/> Intermittent rain<br><input type="radio"/> Steady rain <input type="radio"/> Heavy rain <input type="radio"/> I don't know |

Are you inspecting the right structure? (Use the data provided by your coordinator)

|                                                                                                                                                                                                                                                                                                                                              |                    |  |                                                                                                                                                                                                                                                                                                                            |  |
|----------------------------------------------------------------------------------------------------------------------------------------------------------------------------------------------------------------------------------------------------------------------------------------------------------------------------------------------|--------------------|--|----------------------------------------------------------------------------------------------------------------------------------------------------------------------------------------------------------------------------------------------------------------------------------------------------------------------------|--|
|                                                                                                                                                                                                                                                              | 1) STRUCTURE's ID: |  | 2) DENOMINATION or LOCATION:<br>Use two reference points,<br>e.g. Crossing Street X with stream Y.                                                                                                                                                                                                                         |  |
| 3) TYPE                                                                                                                                                                                                                                                                                                                                      |                    |  | 4) CONNECTED STRUCTURES                                                                                                                                                                                                                                                                                                    |  |
|  <input type="radio"/> Open check dam<br> <input type="radio"/> Consolidation check dam<br><input type="radio"/> Could not be answered<br><input type="radio"/> I don't know |                    |  | <input type="radio"/> No connected structure<br><input type="checkbox"/> Structures to deviate water from the stream<br><input type="checkbox"/> Bridge or culvert<br><input type="checkbox"/> Retention basin (immediately upstream)<br><input type="radio"/> Could not be answered<br><input type="radio"/> I don't know |  |

How safe were the conditions to carry out the inspection?

|                                                                                  |                                                                                                                                    |                                                                                                                                                                                                                                    |
|----------------------------------------------------------------------------------|------------------------------------------------------------------------------------------------------------------------------------|------------------------------------------------------------------------------------------------------------------------------------------------------------------------------------------------------------------------------------|
|  | 1) HOW EASY WAS TO REACH THE STRUCTURE?  #: _____ | <input type="radio"/> Could not be answered<br><input type="radio"/> I don't know                                                                                                                                                  |
| <input type="radio"/> 1. It's next to the road. Assessable from the road.        | <input type="radio"/> 2. Accessible by car on a forest road or by foot.                                                            | <input type="radio"/> 3. Accessible only by foot.<br><input type="radio"/> 4. The access to the structure requires the removal of trees or overcoming obstacles.<br><input type="radio"/> 5. It's too dangerous to reach the site. |

|                                                                                                                                                                                                                                                                                           |                                                                                                                                                                                                                                                                                         |
|-------------------------------------------------------------------------------------------------------------------------------------------------------------------------------------------------------------------------------------------------------------------------------------------|-----------------------------------------------------------------------------------------------------------------------------------------------------------------------------------------------------------------------------------------------------------------------------------------|
|                                                                                                                                                                                                           | 2) HOW IS THE STREAM DURING THE INSPECTION?  #: _____                                                                                                                                                 |
| <b>Stream water:</b><br><input type="radio"/> No (dry)<br><input type="radio"/> Yes, it's ponding<br><input type="radio"/> Yes, it's flowing<br><input type="radio"/> Could not be answered<br><input type="radio"/> I don't know                                                         | <b>Stream water flows:</b><br><input type="radio"/> Clear and transparent<br><input type="radio"/> Transporting mainly fine material<br><input type="radio"/> Transporting wood and other material<br><input type="radio"/> Could not be answered<br><input type="radio"/> I don't know |
| <b>Rainfall conditions during the inspection::</b><br><input type="radio"/> None<br><input type="radio"/> Intermittent rain<br><input type="radio"/> Steady rain<br><input type="radio"/> Heavy rain<br><input type="radio"/> Could not be answered<br><input type="radio"/> I don't know | <b>Snow presence:</b><br><input type="radio"/> No<br><input type="radio"/> Yes<br><input type="radio"/> Could not be answered<br><input type="radio"/> I don't know                                                                                                                     |

Could you rate the following aspects regarding the functionality of the structure?

|                                                                                                                                                                                                                                                                                                                                                                                                                   |                                                                                                                                                                                                                                             |
|-------------------------------------------------------------------------------------------------------------------------------------------------------------------------------------------------------------------------------------------------------------------------------------------------------------------------------------------------------------------------------------------------------------------|---------------------------------------------------------------------------------------------------------------------------------------------------------------------------------------------------------------------------------------------|
|                                                                                                                                                                                                                                                                                                                                 | A) CONDITION OF THE STRUCTURE                                                                                                                                                                                                               |
| 1) Is the stream flow passing where it should be?  #: _____                                                                                                                                                                                                                                                                    | <input type="radio"/> Could not be answered<br><input type="radio"/> I don't know                                                                                                                                                           |
| <b>Stream flow deviated to the LEFT</b><br>                                                                                                                                                                                                                                                                                     | <b>Normal condition of the stream</b><br>                                                                                                                |
| <input type="radio"/> Outside of the structure<br><input type="radio"/> On the wing                                                                                                                                                                                                                                                                                                                               | <input type="radio"/> Through the section of the spillway<br><input type="radio"/> On the wing<br><input type="radio"/> Outside of the structure                                                                                            |
| 2) What is the status of the check dam itself?  #: _____                                                                                                                                                                                                                                                                       | <input type="radio"/> Could not be answered<br><input type="radio"/> I don't know                                                                                                                                                           |
| <input type="radio"/> 1. Structural elements are in good status, "in order".<br><input type="radio"/> 2. Elements have slight deterioration without cracks.<br><input type="radio"/> 3. Elements have visible deterioration with cracks.<br><input type="radio"/> 4. Elements have deep erosion with missing parts.<br><input type="radio"/> 5. Structural damage that compromise the stability of the structure. | <b>3) How visible is the basis of the structure?</b><br> #: _____<br> |
| <input type="radio"/> 1. The basis of the structure is NOT VISIBLE.<br><input type="radio"/> 2. The upper part of the basis is visible.<br><input type="radio"/> 3. The lower part of the basis is visible.                                                                                                                                                                                                       | <input type="radio"/> 4. There is an opening path below the basis of the structure.<br><input type="radio"/> 5. Scouring at the basis of the structure.                                                                                     |
| <input type="radio"/> Could not be answered<br><input type="radio"/> I don't know                                                                                                                                                                                                                                                                                                                                 |                                                                                                                                                                                                                                             |
| 4) Is there any scouring protection?  #: _____                                                                                                                                                                                                                                                                                  | <input type="radio"/> No.<br><input type="radio"/> Yes, in good condition.<br><input type="radio"/> Yes but not in good condition<br><input type="radio"/> Could not be answered<br><input type="radio"/> I don't know                      |

|                                                                                                                                                                                                                                                                                                                        |  |  |                                                                                                                                                                                                                                                                                                                                 |  |  |
|------------------------------------------------------------------------------------------------------------------------------------------------------------------------------------------------------------------------------------------------------------------------------------------------------------------------|--|--|---------------------------------------------------------------------------------------------------------------------------------------------------------------------------------------------------------------------------------------------------------------------------------------------------------------------------------|--|--|
| <b>B) LEVEL OF OBSTRUCTION AT STRUCTURE'S LOCATION AND THE STREAM CHANNEL:</b>                                                                                                                                                                                                                                         |  |  |                                                                                                                                                                                                                                                                                                                                 |  |  |
| <b>1) Obstruction level at OPEN check dams</b><br><input type="radio"/> 1. No obstruction<br><input type="radio"/> 2. <20%<br><input type="radio"/> 3. 20-40%<br><input type="radio"/> 4. 40-60%<br><input type="radio"/> 5. >60%<br><input type="radio"/> Could not be answered<br><input type="radio"/> I don't know |  |  | <b>2) Sedimentation level in the retention basin for OPEN check dams</b><br><input type="radio"/> Does not apply for consolidation check dams.<br><input type="radio"/> >66%<br><input type="radio"/> 33-66%<br><input type="radio"/> <33%<br><input type="radio"/> Could not be answered<br><input type="radio"/> I don't know |  |  |
| 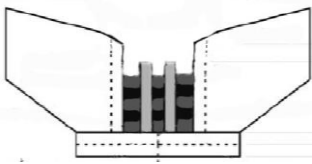                                                                                                                                                                                                                                      |  |  |                                                                                                                                                                                                                                               |  |  |
| <b>3) Is there any obstruction at the downstream channel of the structure?</b><br><input type="radio"/> #: _____                                                                                                                                                                                                       |  |  |                                                                                                                                                                                                                                                                                                                                 |  |  |
|                                                                                                                                                                                                                                      |  |  |                                                                                                                                                                                                                                                                                                                                 |  |  |
| <input type="radio"/> 1. No obstruction <input type="radio"/> 2. <20% <input type="radio"/> 3. 20-40% <input type="radio"/> 4. 40-60% with deviation of the flow <input type="radio"/> 5. > 60% or buried by sediment <input type="radio"/> Could not be answered<br><input type="radio"/> I don't know                |  |  |                                                                                                                                                                                                                                                                                                                                 |  |  |

|                                                                                                         |  |                                                                                      |  |                                                                                        |  |
|---------------------------------------------------------------------------------------------------------|--|--------------------------------------------------------------------------------------|--|----------------------------------------------------------------------------------------|--|
| <b>C) LEVEL OF EROSION OF THE BANK WITHIN 20 meters UPSTREAM AND DOWNSTREAM OF THE STRUCTURE?</b>       |  |                                                                                      |  |                                                                                        |  |
| Use the scale to assess the erosion level with reference to the worst case in each section of the bank. |  |                                                                                      |  |                                                                                        |  |
| <b>1. Minimum erosion</b>                                                                               |  | <b>2.</b>                                                                            |  | <b>3.</b>                                                                              |  |
| Structural elements are in good status "in order" or continuous presence of vegetation in the bank.     |  | Elements with slight erosion or slight irregularities in the vegetation of the bank. |  | Elements with visible erosion or visible irregularities in the vegetation of the bank. |  |
| <b>4.</b>                                                                                               |  | <b>5. Maximum erosion</b>                                                            |  |                                                                                        |  |
| Parts are eroded by the stream flow with an opening below the protection of the bank.                   |  | Parts are missing, there is an important drift. Bank without vegetative protection.  |  |                                                                                        |  |

  

|                                                                                                                                                                                              |  |                                                                                                                                                                                                                   |                                                                       |                                                                                                                                                                                              |  |
|----------------------------------------------------------------------------------------------------------------------------------------------------------------------------------------------|--|-------------------------------------------------------------------------------------------------------------------------------------------------------------------------------------------------------------------|-----------------------------------------------------------------------|----------------------------------------------------------------------------------------------------------------------------------------------------------------------------------------------|--|
| <b>1) LEFT BANK 20m UPSTREAM</b><br><input type="radio"/> #: _____                                                                                                                           |  |                                                                                                                                                                                                                   | <b>2) RIGHT BANK 20m UPSTREAM</b><br><input type="radio"/> #: _____   |                                                                                                                                                                                              |  |
| <b>Presence of walls or protection works</b>                                                                                                                                                 |  | <b>Erosion level in the bank</b>                                                                                                                                                                                  |                                                                       | <b>Presence of walls or protection works</b>                                                                                                                                                 |  |
| <input type="radio"/> No<br><input type="radio"/> ≤ Less 20m.<br><input type="radio"/> > More than 20m.<br><input type="radio"/> Could not be answered<br><input type="radio"/> I don't know |  | <input type="radio"/> 1. <input type="radio"/> 2. <input type="radio"/> 3. <input type="radio"/> 4. <input type="radio"/> 5.<br><input type="radio"/> Could not be answered<br><input type="radio"/> I don't know |                                                                       | <input type="radio"/> No<br><input type="radio"/> ≤ Less 20m.<br><input type="radio"/> > More than 20m.<br><input type="radio"/> Could not be answered<br><input type="radio"/> I don't know |  |
|                                                                                                                                                                                              |  |                                                                                                                                                                                                                   |                                                                       |                                                                                                                                                                                              |  |
| <b>3) LEFT BANK 20m DOWNSTREAM</b><br><input type="radio"/> #: _____                                                                                                                         |  |                                                                                                                                                                                                                   | <b>4) RIGHT BANK 20m DOWNSTREAM</b><br><input type="radio"/> #: _____ |                                                                                                                                                                                              |  |
| <b>Presence of walls or protection works</b>                                                                                                                                                 |  | <b>Erosion level in the bank</b>                                                                                                                                                                                  |                                                                       | <b>Presence of walls or protection works</b>                                                                                                                                                 |  |
| <input type="radio"/> No<br><input type="radio"/> ≤ Less 20m.<br><input type="radio"/> > More than 20m.<br><input type="radio"/> Could not be answered<br><input type="radio"/> I don't know |  | <input type="radio"/> 1. <input type="radio"/> 2. <input type="radio"/> 3. <input type="radio"/> 4. <input type="radio"/> 5.<br><input type="radio"/> Could not be answered<br><input type="radio"/> I don't know |                                                                       | <input type="radio"/> No<br><input type="radio"/> ≤ Less 20m.<br><input type="radio"/> > More than 20m.<br><input type="radio"/> Could not be answered<br><input type="radio"/> I don't know |  |
|                                                                                                                                                                                              |  |                                                                                                                                                                                                                   |                                                                       |                                                                                                                                                                                              |  |

Mark on the scheme where the erosion level is equal or larger than 3.  
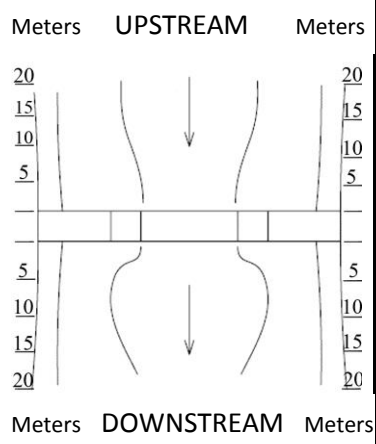

|                                                                                    |                                                    |                                                    |                                                    |                                                    |                                         |
|------------------------------------------------------------------------------------|----------------------------------------------------|----------------------------------------------------|----------------------------------------------------|----------------------------------------------------|-----------------------------------------|
| <b>Is there any anthropic element within the same control distance?</b>            |                                                    |                                                    |                                                    |                                                    |                                         |
|  | <b>1) 20m UPSTREAM</b>                             |                                                    | <b>2) 20m DOWNSTREAM</b>                           |                                                    | <b>Comments: Infrastructure details</b> |
|                                                                                    | <b>Left</b>                                        | <b>Right</b>                                       | <b>Left</b>                                        | <b>Right</b>                                       |                                         |
| Road infrastructure                                                                | <input type="radio"/> No <input type="radio"/> Yes |                                         |
| Buildings                                                                          | <input type="radio"/> No <input type="radio"/> Yes |                                         |

  

|                                                                                                                                                                                                            |                                                                                                   |                                                                                   |
|------------------------------------------------------------------------------------------------------------------------------------------------------------------------------------------------------------|---------------------------------------------------------------------------------------------------|-----------------------------------------------------------------------------------|
|  <b>Could an ordinary intervention with volunteers of CP improve the functionality of the structure? Comments: _____</b> |                                                                                                   | <input type="radio"/> Could not be answered<br><input type="radio"/> I don't know |
| <input type="radio"/> No action is required                                                                                                                                                                | <input type="radio"/> Requires routine cleaning of blockages by hand (maximum with 10 volunteers) | <input type="radio"/> Requires cleaning with equipment support.                   |
| <input type="radio"/> Other action than cleaning is required (Need for a second level inspection)                                                                                                          |                                                                                                   |                                                                                   |
